# Supplementary material
Source: Research Square preprint supplement (doi:10.21203/rs.3.rs-9581907/v1)
Supplement: Supplementary file 1 [file c8d3a7d67ad0b607e04cc906.docx]

**Supplementary Table S1. AUDIT specification sensitivity and extended hepatic-marker analysis (anchored ±6m)**

**Panel A — Longitudinal slope×AUDIT interaction across alternative AUDIT specifications**

| **AUDIT specification** | **β (slope×AUDIT, log-units/year)** | **p-value** | **Notes** |
| --- | --- | --- | --- |
| AUDIT ≥ 8 (primary, dichotomous) | +0.0160 | 0.389 | Random intercept + slope per patient |
| AUDIT continuous (per point) | −0.00007 | 0.966 | No effect |
| AUDIT-C ≥ 3 (partial, 2 items) | −0.0042 | 0.793 | Item 3 corrupted in source spreadsheet |
| AUDIT sex-specific (NIAAA) | +0.0011 | 0.945 | F ≥ 4, M ≥ 8 |

**Panel B — Extended hepatic-marker analysis with MCV (hematological)**

| **Marker** | **AUDIT− (n)** | **Median (P25–P75)** | **AUDIT+ (n)** | **Median (P25–P75)** | **p (MW)** | **q (BH n=5)** | **AUC** |
| --- | --- | --- | --- | --- | --- | --- | --- |
| Gamma-GT (U/L) | 45 | 15.0 | 14 | 31.0 | 0.011 | 0.055 | 0.727 |
| AST (U/L) | 45 | 25.0 | 14 | 24.5 | 0.886 | 0.886 | 0.487 |
| ALT (U/L) | 45 | 25.0 | 14 | 26.0 | 0.521 | 0.651 | 0.558 |
| AST/ALT ratio | 45 | 1.03 | 14 | 0.89 | 0.198 | 0.495 | 0.399 |
| MCV (fL) | 48 | 87.8 | 14 | 88.05 | 0.405 | 0.651 | 0.574 |

*Panel A: random-intercept + random-slope mixed model on log-GGT; LRT confirmed random slopes are necessary (p<0.001). All four AUDIT specifications converged on a non-significant slope × AUDIT interaction. Panel B: extended hepatic family adding MCV (5 outcomes) — under this broader family GGT q-BH = 0.055 (borderline). The primary analysis (Table 3) used the 4-enzyme hepatic family for biological coherence; MCV is a hematological macrocytosis marker with a different mechanism.*
