# Supplementary material
Source: Research Square preprint supplement (doi:10.21203/rs.3.rs-9581907/v1)
Supplement: Supplementary file 2 [file d0c20d28e1a70e28fe5018f1.pdf]

## STROBE Statement — Checklist for Cross-Sectional Studies

*Manuscript: "Clinical and psychometric predictors of post-bariatric alcohol use disorder, with anchored gamma-glutamyl transferase as a concurrent objective marker: a cross-sectional study"*

| Item # | Section                             | Recommendation                                                                                                                  | Page/Section in manuscript                                         |
|--------|-------------------------------------|---------------------------------------------------------------------------------------------------------------------------------|--------------------------------------------------------------------|
| 1      | Title and abstract                  | Indicate the study's design with a commonly used term in the title or the abstract                                              | Title page; Abstract                                               |
| 1      | Title and abstract                  | Provide in the abstract an informative and balanced summary of what was done and what was found                                 | Abstract                                                           |
| 2      | Introduction — Background/rationale | Explain the scientific background and rationale for the investigation being reported                                            | Introduction §1–2                                                  |
| 3      | Introduction — Objectives           | State specific objectives, including any prespecified hypotheses                                                                | Introduction §3                                                    |
| 4      | Methods — Study design              | Present key elements of study design early in the paper                                                                         | Methods — Study design                                             |
| 5      | Methods — Setting                   | Describe the setting, locations, and relevant dates, including periods of recruitment, exposure, follow-up, and data collection | Methods — Population and recruitment                               |
| 6      | Methods — Participants              | Give the eligibility criteria, and the sources and methods of selection of participants                                         | Methods — Population                                               |
| 7      | Methods — Variables                 | Clearly define all outcomes, exposures, predictors, potential confounders, and effect modifiers                                 | Methods — Psychometric assessment, Clinical and laboratory linkage |
| 8      | Methods — Data sources/measurement  | For each variable of interest, give sources of data and details of methods of assessment (measurement)                          | Methods — Clinical and laboratory linkage                          |

|            |                                  |                                                                                                                                         |                                                                                               |
|------------|----------------------------------|-----------------------------------------------------------------------------------------------------------------------------------------|-----------------------------------------------------------------------------------------------|
| <b>9</b>   | Methods — Bias                   | Describe any efforts to address potential sources of bias                                                                               | Methods — Anchored cross-sectional approach; Discussion — Limitations                         |
| <b>10</b>  | Methods — Study size             | Explain how the study size was arrived at                                                                                               | Methods — Population (139 enrolled, 130 linked)                                               |
| <b>11</b>  | Methods — Quantitative variables | Explain how quantitative variables were handled in the analyses                                                                         | Methods — Statistical analysis                                                                |
| <b>12</b>  | Methods — Statistical methods    | Describe all statistical methods, including those used to control for confounding                                                       | Methods — Statistical analysis                                                                |
| <b>12b</b> |                                  | Describe any methods used to examine subgroups and interactions                                                                         | Methods — Statistical analysis (sensitivity)                                                  |
| <b>12c</b> |                                  | Explain how missing data were addressed                                                                                                 | Methods — Statistical analysis (anchored windows handle misalignment)                         |
| <b>12d</b> |                                  | If applicable, describe analytical methods taking account of sampling strategy                                                          | NA — convenience sample, single center                                                        |
| <b>12e</b> |                                  | Describe any sensitivity analyses                                                                                                       | Methods — Sensitivity (AUDIT continuous, AUDIT-C, sex-specific NIAAA, comorbidity adjustment) |
| <b>13</b>  | Results — Participants           | Report numbers of individuals at each stage of study (eligible, examined, included)                                                     | Results — Sample characteristics; Methods (139 → 130)                                         |
| <b>14</b>  | Results — Descriptive data       | Give characteristics of study participants (e.g., demographic, clinical, social) and information on exposures and potential confounders | Table 1; Results §1                                                                           |
| <b>15</b>  | Results — Outcome data           | Report numbers of outcome events or summary measures                                                                                    | Results §1 (24.6% AUDIT+); Tables 1–3                                                         |
| <b>16</b>  | Results — Main results           | Give unadjusted estimates and, if applicable, confounder-adjusted estimates and their precision                                         | Results §2–3; Tables 2, 3                                                                     |
| <b>16b</b> |                                  | Report category                                                                                                                         | Methods (AUDIT≥8);                                                                            |

|            |                               |                                                                                                                                                                            |                                               |
|------------|-------------------------------|----------------------------------------------------------------------------------------------------------------------------------------------------------------------------|-----------------------------------------------|
|            |                               | boundaries when continuous variables were categorized                                                                                                                      | Tables                                        |
| <b>16c</b> |                               | If relevant, consider translating estimates of relative risk into absolute risk for a meaningful time period                                                               | Discussion §2                                 |
| <b>17</b>  | Results — Other analyses      | Report other analyses done — e.g., analyses of subgroups, interactions, sensitivity                                                                                        | Results §4 (longitudinal null); Tables S1, S2 |
| <b>18</b>  | Discussion — Key results      | Summarise key results with reference to study objectives                                                                                                                   | Discussion §1                                 |
| <b>19</b>  | Discussion — Limitations      | Discuss limitations of the study, taking into account sources of potential bias or imprecision                                                                             | Discussion — Limitations                      |
| <b>20</b>  | Discussion — Interpretation   | Give a cautious overall interpretation of results considering objectives, limitations, multiplicity of analyses, results from similar studies, and other relevant evidence | Discussion §2–4                               |
| <b>21</b>  | Discussion — Generalisability | Discuss the generalisability (external validity) of the study results                                                                                                      | Discussion — Limitations (single-center)      |
| <b>22</b>  | Other information — Funding   | Give the source of funding and the role of the funders for the present study                                                                                               | Statements — Funding                          |

*Note: Page references are approximate, based on the submitted manuscript layout. The complete analytical pipeline and de-identified dataset are publicly available (OSF DOI pending, GitHub link in manuscript).*
