# Supplementary material
Source: Research Square preprint supplement (doi:10.21203/rs.3.rs-9581907/v1)
Supplement: Supplementary file 3 [file fdf89fac4834f21fbb20f4ef.docx]

**Supplementary Table S2. Mixed-model specification: random-intercept vs random-intercept+slope (LRT) and leave-one-out diagnostic for gamma-GT**

| **Outcome** | **Random-intercept LL** | **Intercept+slope LL** | **LRT p-value** |
| --- | --- | --- | --- |
| Gamma-GT (log) | -289.47 | -279.59 | <0.001 |
| AST (log) | -87.83 | -81.89 | 0.003 |
| ALT (log) | -198.62 | -191.33 | 0.001 |
| VCM (log) | 683.92 | 687.54 | 0.027 |
| AST/ALT ratio | 167.18 | 167.42 | 0.784 |

*Likelihood-ratio tests (LRT) confirmed the necessity of random slopes for all hepatic outcomes except AST/ALT ratio. Leave-one-subject-out diagnostic for gamma-GT slope×AUDIT: base coefficient β=0.016, range across LOO iterations [0.004, 0.032]. Removing the top-3 most influential subjects yielded β=0.015, p=0.426 — no individual subject drove the null finding.*
